# Supplementary material for: Education and myopia: assessing the direction of causality by mendelian randomisation
Source: BMJ. 2018 Jun 6;361:k2022. doi: 10.1136/bmj.k2022 (PMC5987847; doi:10.1136/bmj.k2022)
Supplement: Supplementary file 1 — Appendix: Supplementary figures and tables [file moue042661.ww1.pdf]

## Supplementary Figures and Tables

### Supplementary Figure 1. Mendelian randomisation power calculation for the available sample size in UK Biobank

(**N=69,798**). Causal association of: **(A)** time spent in education (years [yrs]) on refractive error (Dioptres [D]) using allele score with  $R^2=0.0073$  (80% power = 0.14 D/yr); and **(B)** refractive error on time spent in education using allele score with  $R^2=0.0442$  (80% power = 0.048 yr/D).

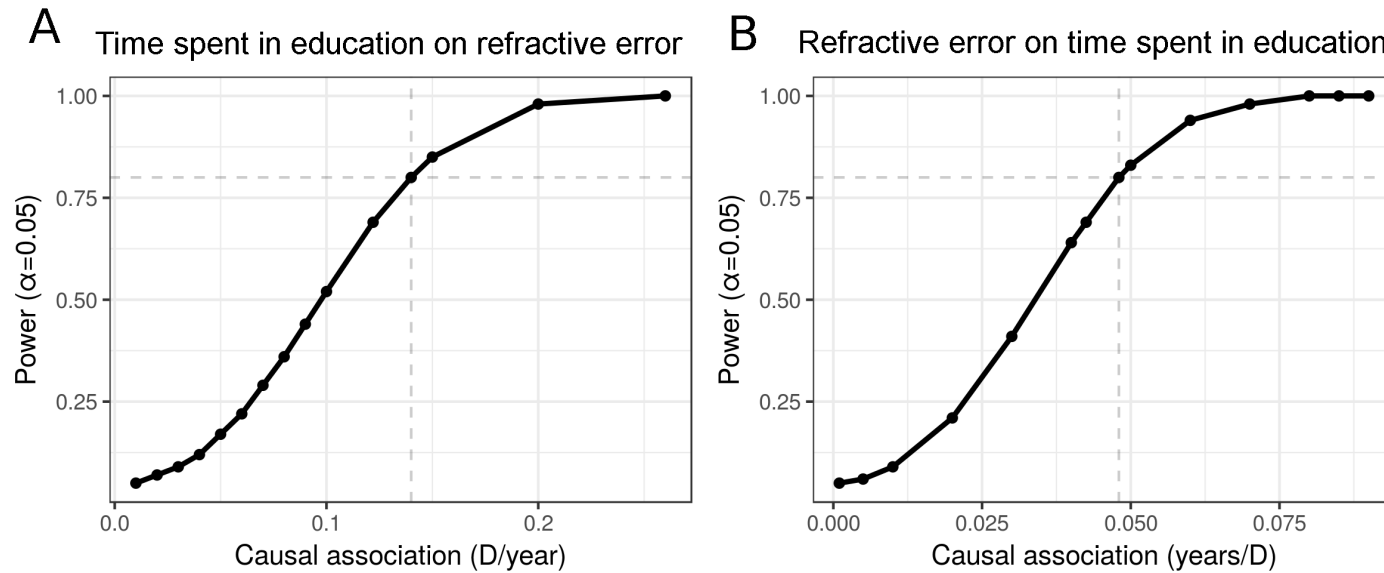

**Supplementary Figure 2. Genetic principal component 9 (PC9) is associated with self-reported place-of-birth in Wales and with refractive error. (A)** Scatter plot of geographic coordinates for place-of-birth vs. PC9 level. **(B)** Refractive error distribution in Dioptres (D) by PC9 level category. White rectangle shows inter-quartile range. Black circle shows median.

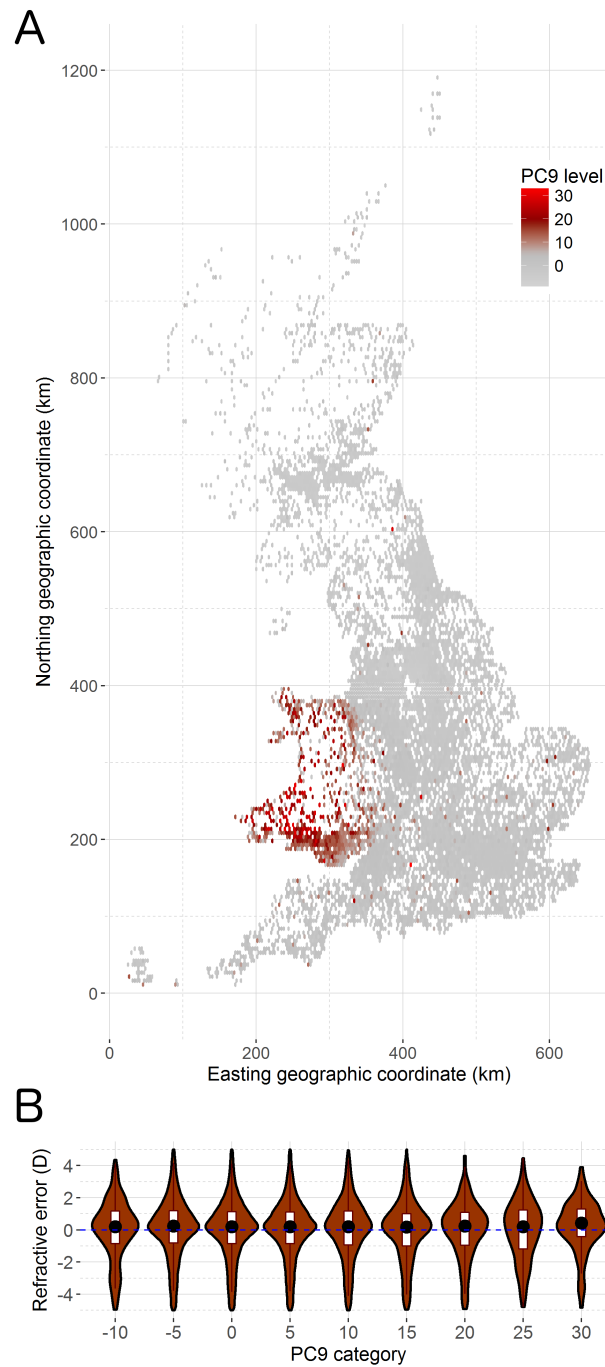

**Supplementary Figure 3. Schematic representations of horizontal and vertical pleiotropy in the relationship between the instrumental variables, education and IQ. (A)** Horizontal pleiotropy could lead to bias in the MR causal estimate, but only if there is a causal path between IQ and myopia. In communities with no formal education system there is a very low prevalence of myopia, making such a causal path between IQ and myopia unlikely. **(B)** Vertical pleiotropy would not lead to bias in the MR causal estimate.

### A Horizontal Pleiotropy

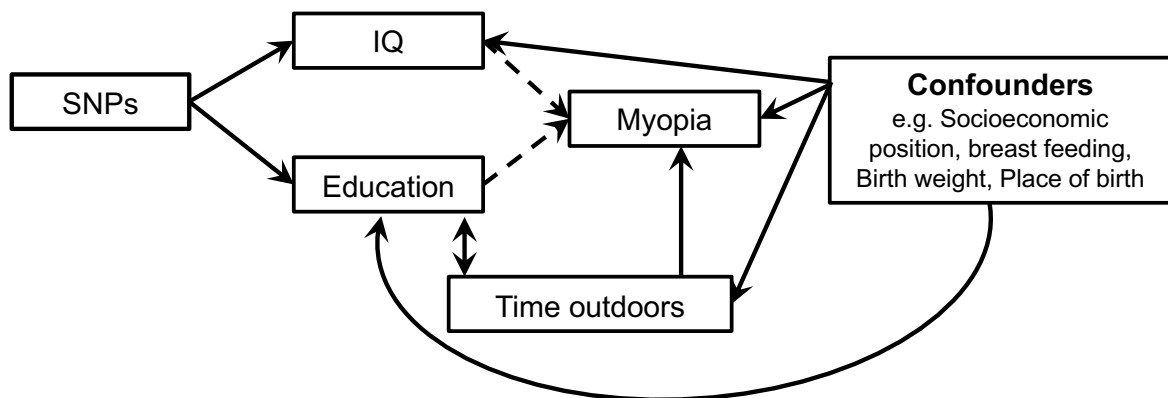

### B Vertical Pleiotropy

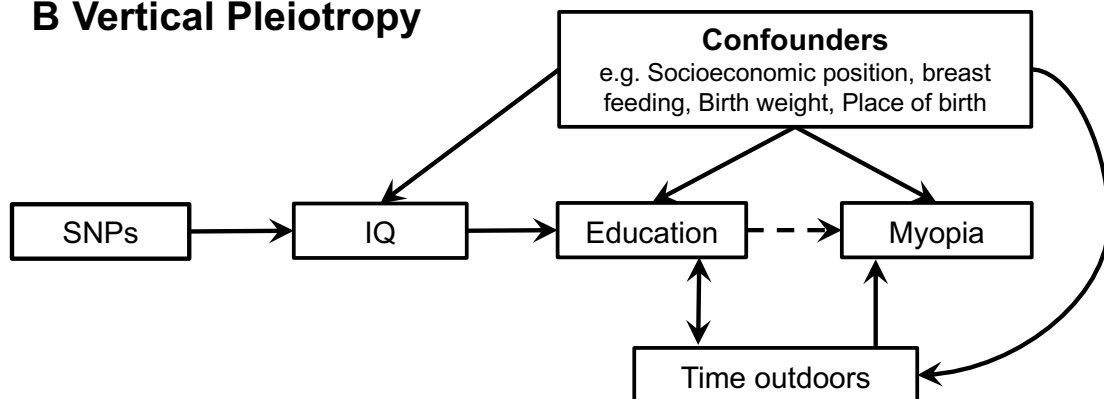

**Supplementary Table 1. Baseline characteristics of UK Biobank cohort for refractive error, age completed education and potential confounder variables.**

Refractive errors (in Dioptres) were defined as: (i) myopia  $\leq 0.75$ ; (ii)  $-0.75 < \text{emmetropia} < 0.75$ ; (iii) hypermetropia  $\geq 0.75$ .

*Townsend deprivation index (TDI)* was natural log-transformed.

| Variable                        | All (N=69,798)                  |          | Myopic (N=21,055)               |          | Emmetropic (N=25,209)           |          | Hypermetropic (N=23,534)        |          |
|---------------------------------|---------------------------------|----------|---------------------------------|----------|---------------------------------|----------|---------------------------------|----------|
|                                 | Mean or %                       | SD       |
| Refractive error (D)            | -0.271 (-0.291 to -0.251)       | 2.679    | -3.329 (-3.361 to -3.297)       | 2.385    | 0.071 (0.066 to 0.076)          | 0.400    | 2.099 (2.081 to 2.117)          | 1.385    |
| Age completed education (years) | 18.15 (18.13 to 18.17)          | 2.50     | 18.80 (18.76 to 18.83)          | 2.39     | 18.08 (18.05 to 18.11)          | 2.46     | 17.66 (17.62 to 17.69)          | 2.51     |
| Age (years)                     | 57.09 (57.03 to 57.14)          | 7.81     | 55.97 (55.86 to 56.07)          | 7.70     | 55.14 (55.04 to 55.24)          | 8.10     | 60.18 (60.09 to 60.26)          | 6.56     |
| Sex                             |                                 |          |                                 |          |                                 |          |                                 |          |
| - Male                          | 47.2%                           | -        | 47.4%                           | -        | 48.6%                           | -        | 45.5%                           | -        |
| - Female                        | 52.8%                           | -        | 52.6%                           | -        | 51.4%                           | -        | 54.5%                           | -        |
| Birth weight                    | 3.325 (3.320 to 3.330)          | 0.637    | 3.310 (3.302 to 3.318)          | 0.622    | 3.330 (3.322 to 3.338)          | 0.628    | 3.332 (3.324 to 3.340)          | 0.662    |
| Breastfed                       |                                 |          |                                 |          |                                 |          |                                 |          |
| - Yes                           | 78.6%                           | -        | 78.3%                           | -        | 87.9%                           | -        | 81.6%                           | -        |
| - No                            | 20.4%                           | -        | 20.7%                           | -        | 22.1%                           | -        | 18.4%                           | -        |
| Townsend deprivation index      | -0.012 (-0.016 to -0.008)       | 0.495    | -0.012 (-0.019 to -0.005)       | 0.493    | -0.005 (-0.011 to 0.001)        | 0.494    | -0.019 (-0.025 to -0.013)       | 0.499    |
| Northing                        | 3.016e+5 (3.007e+5 to 3.024e+5) | 1.135e+5 | 2.955e+5 (2.030e+5 to 2.971e+5) | 1.162e+5 | 3.015e+5 (3.001e+5 to 3.029e+5) | 1.124e+5 | 3.071e+5 (3.057e+5 to 3.085e+5) | 1.121e+5 |
| Easting                         | 4.279e+5 (4.272e+5 to 4.286e+5) | 8.911e+4 | 4.318e+5 (4.305e+5 to 4.330e+5) | 9.089e+4 | 4.318e+5 (4.305e+5 to 4.330e+5) | 9.089e+4 | 4.224e+5 (4.233e+5 to 4.256e+5) | 8.869e+4 |

**Supplementary Table 2. Observational (OLS) associations of confounding variables with education and myopia allele scores and outcomes.**

Only associations that are concordant with the observational direction of effect between time spent in education and refractive error are shown. These include *northing* and *easting* geographical coordinates, and genetic population stratification principal components 8 and 9.

| Exposure | Outcome                | N     | Beta                         | SE     | P-value |
|----------|------------------------|-------|------------------------------|--------|---------|
| Easting  | Refractive error       | 69797 | -1.0e-6 (-1.3e-6 to -8.1e-7) | 1.1e-7 | <2e-16  |
| Easting  | Education              | 69797 | 8.9e-7 (6.8e-7 to 1.1e-6)    | 1.1e-7 | <2e-16  |
| Easting  | Myopia allele score    | 69797 | 3.8e-8 (8.6e-9 to 6.7e-8)    | 1.5e-8 | 1e-2    |
| Easting  | Education allele score | 69797 | 6.1e-9 (-2.2e-9 to 1.4e-8)   | 4.2e-9 | 2e-1    |
| Northing | Education              | 69797 | -1.6e-6 (-1.8e-6 to -1.5e-6) | 8.3e-8 | <2e-16  |
| Northing | Refractive error       | 69797 | 1.2e-6 (9.8e-7 to 1.3e-6)    | 8.9e-8 | <2e-16  |
| Northing | Education allele score | 69797 | -1.3e-8 (-2.0e-8 to -6.7e-9) | 3.3e-9 | 7e-5    |
| Northing | Myopia allele score    | 69797 | -3.2e-8 (-5.5e-8 to -9.2e-9) | 1.2e-8 | 6e-3    |
| PC8      | Education              | 69798 | 2.7e-2 (1.7e-2 to 3.7e-2)    | 4.9e-3 | 3e-8    |
| PC8      | Refractive error       | 69798 | -1.2e-2 (-2.3e-2 to -2.2e-3) | 5.2e-3 | 2e-2    |
| PC8      | Education allele score | 69798 | 4.2e-4 (4.2e-5 to 8.1e-4)    | 1.9e-4 | 3e-2    |
| PC8      | Myopia allele score    | 69798 | 1.1e-3 (-2.9e-4 to 2.4e-3)   | 6.9e-4 | 1e-1    |
| PC9      | Education              | 69798 | -2.1e-2 (-2.5e-2 to -1.7e-2) | 2.3e-3 | <2e-16  |
| PC9      | Education allele score | 69798 | -3.1e-4 (-4.8e-4 to -1.3e-4) | 9.1e-5 | 8e-4    |
| PC9      | Myopia allele score    | 69798 | -7.8e-4 (-1.4e-3 to -1.5e-4) | 3.2e-4 | 2e-2    |
| PC9      | Refractive error       | 69798 | 5.6e-3 (8.0e-4 to 1.0e-2)    | 2.4e-3 | 2e-2    |

**Supplementary Table 3. Causal estimates of time spent in education on refractive error and refractive error on time spent in education using methods implemented in MR-Base and a split sample in UK Biobank.**

| <i>Exposure</i>         | <i>Outcome</i>          | <i>Method</i>             | <i>N SNPs</i> | <i>Beta</i> | <i>SE</i> | <i>P-value</i> |
|-------------------------|-------------------------|---------------------------|---------------|-------------|-----------|----------------|
| Time spent in education | Refractive error        | MR Egger                  | 67            | -0.399      | 0.125     | 2e-3           |
|                         |                         | Weighted median           | 67            | -0.206      | 0.099     | 0.04           |
|                         |                         | Inverse variance weighted | 67            | -0.271      | 0.070     | 1e-4           |
|                         |                         | Simple mode               | 67            | -0.169      | 0.547     | 0.8            |
|                         |                         | Weighted mode             | 67            | -0.231      | 0.529     | 0.7            |
| Refractive error        | Time spent in education | MR Egger                  | 43            | -0.002      | 0.057     | 1              |
|                         |                         | Weighted median           | 43            | 0.003       | 0.037     | 0.9            |
|                         |                         | Inverse variance weighted | 43            | -0.014      | 0.026     | 0.6            |
|                         |                         | Simple mode               | 43            | -0.091      | 0.071     | 0.2            |
|                         |                         | Weighted mode             | 43            | 0.030       | 0.049     | 0.6            |

**Supplementary Table 4. Table of MR results from sensitivity analyses using alternative encodings of educational exposure and outcome, additional covariates and England-only restriction.**

| Instrument | Exposure                 | Outcome                  | Covariates              | N     | TSLS Beta                 | TSLS SE | TSLS P | Weak instr P | DWH P  |
|------------|--------------------------|--------------------------|-------------------------|-------|---------------------------|---------|--------|--------------|--------|
| Education  | Education                | Refractive error         | sex + age               | 69798 | -0.270 (-0.368 to -0.173) | 0.049   | 4e-8   | <2e-16       | 6e-2   |
| Education  | Education (England only) | Refractive error         | sex + age               | 68152 | -0.269 (-0.369 to -0.171) | 0.050   | 8e-8   | <2e-16       | 7e-2   |
| Education  | Education                | Refractive error         | sex + age + genechip    | 69798 | -0.270 (-0.368 to -0.173) | 0.049   | 4e-8   | <2e-16       | 6e-2   |
| Education  | Education                | Refractive error         | sex + age + PC1-10      | 69798 | -0.277 (-0.376 to -0.179) | 0.050   | 3e-8   | <2e-16       | 4e-2   |
| Education  | Education                | Refractive error         | sex + age + birthweight | 42511 | -0.272 (-0.399 to -0.146) | 0.064   | 2e-5   | <2e-16       | 1e-1   |
| Education  | Education                | Refractive error         | sex + age + breastfed   | 53601 | -0.307 (-0.417 to -0.200) | 0.055   | 2e-8   | <2e-16       | 1e-2   |
| Education  | Education                | Refractive error         | sex + age + northing    | 69797 | -0.264 (-0.363 to -0.166) | 0.050   | 1e-7   | <2e-16       | 7e-2   |
| Education  | Education                | Refractive error         | sex + age + easting     | 69797 | -0.268 (-0.366 to -0.171) | 0.049   | 5e-8   | <2e-16       | 6e-2   |
| Education  | Education                | Refractive error         | sex + age + TDI         | 69737 | -0.271 (-0.371 to -0.173) | 0.050   | 6e-8   | <2e-16       | 6e-2   |
| Education  | Education (Dichotomised) | Refractive error         | sex + age               | 69798 | -0.347 (-0.482 to -0.220) | 0.064   | -      | -            | -      |
| Education  | Education (No college)   | Refractive error         | sex + age               | 45535 | -0.228 (-0.479 to 0.018)  | 0.124   | 7e-2   | <2e-16       | 5e-1   |
| Myopia     | Refractive error         | Education                | sex + age               | 69798 | -0.008 (-0.041 to 0.025)  | 0.017   | 6e-1   | <2e-16       | <2e-16 |
| Myopia     | Refractive error         | Education (England only) | sex + age               | 68152 | -0.009 (-0.042 to 0.025)  | 0.017   | 6e-1   | <2e-16       | <2e-16 |
| Myopia     | Refractive error         | Education (No college)   | sex + age               | 45535 | -0.004 (-0.035 to 0.027)  | 0.016   | 8e-1   | <2e-16       | 7e-06  |
| Myopia     | Refractive error         | Education (Dichotomised) | sex + age               | 69798 | 0.000 (-0.028 to 0.028)   | 0.014   | -      | -            | -      |
| Myopia     | Refractive error         | Education                | sex + age + genechip    | 69798 | -0.009 (-0.041 to 0.025)  | 0.017   | 6e-1   | <2e-16       | <2e-16 |
| Myopia     | Refractive error         | Education                | sex + age + PC1-10      | 69798 | -0.011 (-0.044 to 0.022)  | 0.017   | 5e-1   | <2e-16       | <2e-16 |
| Myopia     | Refractive error         | Education                | sex + age + birthweight | 42511 | 0.016 (-0.026 to 0.057)   | 0.021   | 5e-1   | <2e-16       | 6e-15  |
| Myopia     | Refractive error         | Education                | sex + age + breastfed   | 53601 | 0.007 (-0.030 to 0.044)   | 0.019   | 7e-1   | <2e-16       | <2e-16 |
| Myopia     | Refractive error         | Education                | sex + age + northing    | 69797 | -0.011 (-0.044 to 0.022)  | 0.017   | 5e-1   | <2e-16       | <2e-16 |
| Myopia     | Refractive error         | Education                | sex + age + easting     | 69797 | -0.009 (-0.042 to 0.024)  | 0.017   | 6e-1   | <2e-16       | <2e-16 |
| Myopia     | Refractive error         | Education                | sex + age + TDI         | 69737 | -0.008 (-0.040 to 0.026)  | 0.017   | 7e-1   | <2e-16       | <2e-16 |

**Supplementary Data Table.** Genetic variants used as instrumental variables for time spent in education and myopia in this study. Summary statistics are shown for associations with (1) time spent in education/myopia in the original study, (2) time spent in education and refractive error in the full UK Biobank sample, (3) time spent in education and refractive error in the two UK Biobank split sample groups.

**Myopia SNPs (Pickrell *et al.*, 2016)**

|                 |       |           |                   |         | Association with myopia in Pickrell <i>et al.</i> (2016) |                       |       |               |               | Association with time spent in education in full UKBB cohort |                    |                   |       |       | Association with refractive error in full UKBB cohort |          |       |       |       | Association with time spent in education in UKBB split sample group A |       |        |       |         | Association with refractive error in UKBB split sample group A |        |       |         |       | Association with time spent in education in UKBB split sample group B |       |         |       |        | Association with refractive error in UKBB split sample group B |         |       |  |  |
|-----------------|-------|-----------|-------------------|---------|----------------------------------------------------------|-----------------------|-------|---------------|---------------|--------------------------------------------------------------|--------------------|-------------------|-------|-------|-------------------------------------------------------|----------|-------|-------|-------|-----------------------------------------------------------------------|-------|--------|-------|---------|----------------------------------------------------------------|--------|-------|---------|-------|-----------------------------------------------------------------------|-------|---------|-------|--------|----------------------------------------------------------------|---------|-------|--|--|
| SNPID           | Chrom | Pos       | Genes             | Cyto    | Pickrell Effect allele                                   | Pickrell Other allele | logOR | logOR_lowerCI | logOR_upperCI | P                                                            | UKBB Effect allele | UKBB Other allele | EAF   | Beta  | SE                                                    | P        | N     | Beta  | SE    | P                                                                     | N     | Beta   | SE    | P       | N                                                              | Beta   | SE    | P       | N     | Beta                                                                  | SE    | P       | N     |        |                                                                |         |       |  |  |
| 1:61341632_T_A  | 1     | 61341632  | C1orf87[ ]NFIA    | 1p31.3  | A                                                        | T                     | 0.056 | -0.070        | 0.008         | 13                                                           | A                  | T                 | 0.327 | 0.005 | 0.014                                                 | 7.18E-01 | 69798 | 0.069 | 0.015 | 06                                                                    | 69798 | 0.004  | 0.020 | 8.6E-01 | 34982                                                          | -0.091 | 0.021 | 1.9E-05 | 34982 | 0.007                                                                 | 0.020 | 7.4E-01 | 34816 | -0.047 | 0.022                                                          | 3.0E-02 | 34816 |  |  |
| 1:164213686_C_T | 1     | 164213686 | NUF2[ ]PBX1       | 1q23.3  | C                                                        | T                     | 0.077 | 0.060         | 0.009         | 19                                                           | T                  | C                 | 0.242 | 0.014 | 0.015                                                 | 3.70E-01 | 69798 | 0.118 | 0.017 | 12                                                                    | 69798 | 0.048  | 0.022 | 2.7E-02 | 34982                                                          | -0.117 | 0.023 | 4.5E-07 | 34982 | -0.022                                                                | 0.022 | 3.2E-01 | 34816 | -0.118 | 0.024                                                          | 5.8E-07 | 34816 |  |  |
| 1:200336075_C_T | 1     | 200336075 | NR5A2[ ]ZNF281    | 1q32.1  | C                                                        | T                     | 0.063 | 0.048         | 0.008         | 17                                                           | T                  | C                 | 0.377 | 0.022 | 0.014                                                 | 1.03E-01 | 69798 | 0.088 | 0.015 | 09                                                                    | 69798 | -0.009 | 0.019 | 6.5E-01 | 34982                                                          | -0.093 | 0.020 | 4.6E-06 | 34982 | -0.036                                                                | 0.019 | 6.3E-02 | 34816 | -0.083 | 0.021                                                          | 5.8E-05 | 34816 |  |  |
| 2:45152748_T_C  | 2     | 45152748  | CAMKMT[ ]SIX3     | 2p21    | C                                                        | T                     | 0.063 | 0.045         | 0.009         | 12                                                           | C                  | T                 | 0.188 | 0.011 | 0.017                                                 | 5.26E-01 | 69798 | 0.062 | 0.018 | 04                                                                    | 69798 | -0.004 | 0.024 | 8.6E-01 | 34982                                                          | 0.031  | 0.026 | 2.3E-01 | 34982 | -0.017                                                                | 0.024 | 4.8E-01 | 34816 | 0.094  | 0.026                                                          | 2.7E-04 | 34816 |  |  |
| 2:146888708_G_A | 2     | 146888708 | [ ]               | 2q22.3  | A                                                        | G                     | 0.068 | 0.053         | 0.008         | 20                                                           | A                  | G                 | 0.442 | 0.011 | 0.013                                                 | 3.96E-01 | 69798 | 0.099 | 0.014 | 12                                                                    | 69798 | -0.017 | 0.019 | 3.7E-01 | 34982                                                          | 0.106  | 0.020 | 1.0E-07 | 34982 | -0.006                                                                | 0.019 | 7.7E-01 | 34816 | 0.092  | 0.020                                                          | 7.5E-06 | 34816 |  |  |
| 2:157358750_T_A | 2     | 157358750 | [GPD2]            | 2q24.1  | A                                                        | T                     | 0.059 | 0.043         | 0.008         | 13                                                           | A                  | T                 | 0.697 | 0.026 | 0.014                                                 | 7.34E-02 | 69798 | 0.079 | 0.015 | 07                                                                    | 69798 | 0.042  | 0.020 | 4.1E-02 | 34982                                                          | 0.072  | 0.022 | 9.1E-04 | 34982 | 0.009                                                                 | 0.020 | 6.5E-01 | 34816 | 0.086  | 0.022                                                          | 9.3E-05 | 34816 |  |  |
| 2:172851936_C_G | 2     | 172851936 | HAT1[ ]METAP1D    | 2q31.1  | C                                                        | G                     | 0.067 | -0.084        | 0.009         | 15                                                           | G                  | C                 | 0.236 | 0.020 | 0.015                                                 | 1.85E-01 | 69798 | 0.090 | 0.016 | 08                                                                    | 69798 | -0.022 | 0.022 | 3.0E-01 | 34982                                                          | 0.075  | 0.023 | 1.2E-03 | 34982 | -0.018                                                                | 0.022 | 4.1E-01 | 34816 | 0.105  | 0.023                                                          | 7.0E-06 | 34816 |  |  |
| rs17400325      | 2     | 178565913 | [PDE11A]          | 2q31.2  | C                                                        | T                     | 0.170 | -0.206        | 0.018         | 21                                                           | C                  | T                 | 0.040 | 0.006 | 0.033                                                 | 8.55E-01 | 69798 | 0.302 | 0.035 | 17                                                                    | 69798 | -0.020 | 0.047 | 6.6E-01 | 34982                                                          | -0.235 | 0.050 | 2.5E-06 | 34982 | 0.008                                                                 | 0.046 | 8.7E-01 | 34816 | -0.366 | 0.050                                                          | 2.2E-13 | 34816 |  |  |
| rs1550094       | 2     | 233385396 | [PRSS56]          | 2q37.1  | A                                                        | G                     | 0.097 | 0.082         | 0.008         | 35                                                           | A                  | G                 | 0.692 | 0.002 | 0.014                                                 | 9.01E-01 | 69798 | 0.193 | 0.015 | 36                                                                    | 69798 | -0.008 | 0.020 | 6.9E-01 | 34982                                                          | 0.188  | 0.021 | 1.7E-18 | 34982 | 0.004                                                                 | 0.020 | 8.4E-01 | 34816 | 0.199  | 0.022                                                          | 1.0E-19 | 34816 |  |  |
| 3:24268677_C_T  | 3     | 24268677  | [THR8]            | 3p24.2  | C                                                        | T                     | 0.052 | -0.066        | 0.007         | 12                                                           | T                  | C                 | 0.619 | 0.007 | 0.014                                                 | 5.92E-01 | 69798 | 0.047 | 0.015 | 03                                                                    | 69798 | -0.028 | 0.019 | 1.5E-01 | 34982                                                          | 0.043  | 0.021 | 3.8E-02 | 34982 | 0.013                                                                 | 0.019 | 4.9E-01 | 34816 | 0.051  | 0.021                                                          | 1.5E-02 | 34816 |  |  |
| 3:141076084_T_C | 3     | 141076084 | [ZBTB38]          | 3q23    | C                                                        | T                     | 0.067 | 0.052         | 0.008         | 19                                                           | C                  | T                 | 0.389 | 0.005 | 0.013                                                 | 7.01E-01 | 69798 | 0.071 | 0.014 | 07                                                                    | 69798 | -0.013 | 0.019 | 5.0E-01 | 34982                                                          | 0.055  | 0.020 | 6.6E-03 | 34982 | 0.002                                                                 | 0.019 | 9.2E-01 | 34816 | 0.087  | 0.021                                                          | 2.5E-05 | 34816 |  |  |
| 4:80508788_T_C  | 4     | 80508788  | GK2[ ]JANTXR2     | 4q21.21 | C                                                        | T                     | 0.066 | 0.050         | 0.008         | 15                                                           | C                  | T                 | 0.729 | 0.023 | 0.015                                                 | 1.29E-01 | 69798 | 0.087 | 0.016 | 08                                                                    | 69798 | 0.010  | 0.021 | 6.3E-01 | 34982                                                          | 0.105  | 0.023 | 3.4E-06 | 34982 | 0.035                                                                 | 0.021 | 9.8E-02 | 34816 | 0.070  | 0.023                                                          | 2.3E-03 | 34816 |  |  |
| 6:28270584_T_C  | 6     | 28270584  | PGBD1[ ]ZSCAN31   | 6p22.1  | C                                                        | T                     | 0.059 | -0.075        | 0.008         | 12                                                           | C                  | T                 | 0.299 | 0.018 | 0.015                                                 | 2.05E-01 | 69798 | 0.078 | 0.016 | 07                                                                    | 69798 | -0.009 | 0.020 | 6.5E-01 | 34982                                                          | -0.061 | 0.022 | 5.4E-03 | 34982 | -0.027                                                                | 0.021 | 1.9E-01 | 34816 | -0.096 | 0.022                                                          | 1.9E-05 | 34816 |  |  |
| 6:50809720_T_C  | 6     | 50809720  | [TFAP2B]          | 6p12.3  | C                                                        | T                     | 0.050 | 0.035         | 0.007         | 11                                                           | C                  | T                 | 0.456 | 0.004 | 0.013                                                 | 7.33E-01 | 69798 | 0.064 | 0.014 | 06                                                                    | 69798 | 0.001  | 0.019 | 9.6E-01 | 34982                                                          | 0.062  | 0.020 | 1.9E-03 | 34982 | -0.010                                                                | 0.019 | 6.0E-01 | 34816 | 0.064  | 0.020                                                          | 1.5E-03 | 34816 |  |  |
| 6:73643289_C_A  | 6     | 73643289  | [KCNQ5]           | 6q13    | A                                                        | C                     | 0.124 | -0.138        | 0.007         | 63                                                           | A                  | C                 | 0.590 | 0.000 | 0.013                                                 | 9.77E-01 | 69798 | 0.219 | 0.014 | 52                                                                    | 69798 | -0.013 | 0.019 | 4.9E-01 | 34982                                                          | -0.204 | 0.020 | 7.3E-24 | 34982 | 0.012                                                                 | 0.019 | 5.2E-01 | 34816 | -0.235 | 0.021                                                          | 5.1E-30 | 34816 |  |  |
| rs1064583       | 6     | 116446576 | [NT5DC1:COL10A1]  | 6q22.1  | A                                                        | G                     | 0.054 | 0.040         | 0.007         | 13                                                           | G                  | A                 | 0.402 | 0.005 | 0.013                                                 | 7.18E-01 | 69798 | 0.076 | 0.014 | 07                                                                    | 69798 | -0.004 | 0.019 | 8.5E-01 | 34982                                                          | -0.083 | 0.020 | 4.3E-05 | 34982 | -0.005                                                                | 0.019 | 7.8E-01 | 34816 | -0.070 | 0.021                                                          | 7.1E-04 | 34816 |  |  |
| rs12193446      | 6     | 129820038 | [LAMA2]           | 6q22.33 | A                                                        | G                     | 0.263 | -0.286        | 0.012         | 102                                                          | G                  | A                 | 0.092 | 0.012 | 0.022                                                 | 5.78E-01 | 69798 | 0.450 | 0.024 | 78                                                                    | 69798 | 0.021  | 0.032 | 5.1E-01 | 34982                                                          | 0.450  | 0.034 | 6.3E-41 | 34982 | -0.045                                                                | 0.032 | 1.5E-01 | 34816 | 0.450  | 0.034                                                          | 2.2E-39 | 34816 |  |  |
| 8:40723970_A_G  | 8     | 40723970  | [ZMAT4]           | 8p11.21 | A                                                        | G                     | 0.102 | -0.120        | 0.009         | 31                                                           | G                  | A                 | 0.205 | 0.007 | 0.016                                                 | 6.64E-01 | 69798 | 0.139 | 0.017 | 15                                                                    | 69798 | -0.021 | 0.023 | 3.6E-01 | 34982                                                          | 0.112  | 0.024 | 4.1E-06 | 34982 | 0.007                                                                 | 0.023 | 7.6E-01 | 34816 | 0.167  | 0.025                                                          | 2.6E-11 | 34816 |  |  |
| rs10089517      | 8     | 60178721  | TOX[ ]CA8         | 8q12.1  | A                                                        | C                     | 0.102 | 0.087         | 0.007         | 41                                                           | A                  | C                 | 0.343 | 0.032 | 0.014                                                 | 2.05E-01 | 69798 | 0.168 | 0.015 | 30                                                                    | 69798 | -0.030 | 0.019 | 1.2E-01 | 34982                                                          | 0.152  | 0.021 | 2.4E-13 | 34982 | -0.034                                                                | 0.020 | 8.0E-02 | 34816 | 0.184  | 0.021                                                          | 3.1E-18 | 34816 |  |  |
| 9:18362865_A_G  | 9     | 18362865  | SH3GL2[ ]ADAMTSL1 | 9p22.2  | A                                                        | G                     | 0.056 | 0.042         | 0.007         | 14                                                           | G                  | A                 | 0.586 | 0.017 | 0.014                                                 | 2.21E-01 | 69798 | 0.110 | 0.015 | 14                                                                    | 69798 | 0.016  | 0.019 | 4.1E-01 | 34982                                                          | -0.108 | 0.020 | 1.2E-07 | 34982 | 0.017                                                                 | 0.019 | 3.9E-01 | 34816 | -0.111 | 0.021                                                          | 8.5E-08 | 34816 |  |  |
| 9:71770939_G_A  | 9     | 71770939  | FXN[ ]TJP2        | 9q21.11 | A                                                        | G                     | 0.083 | -0.101        | 0.009         | 21                                                           | A                  | G                 | 0.212 | 0.010 | 0.016                                                 | 5.41E-01 | 69798 | 0.091 | 0.017 | 07                                                                    | 69798 | -0.009 | 0.023 | 6.9E-01 | 34982                                                          | -0.104 | 0.024 | 1.7E-05 |       |                                                                       |       |         |       |        |                                                                |         |       |  |  |

Education SNPs (Okbay *et al.*, 2016)

|            |                 |      |         | Association with time spent in education in Okbay <i>et al.</i> (2016) |                    |           |        |       |          |                    | Association with time spent in education in full UKBB cohort |          |        |       |          | Association with refractive error in full UKBB cohort |        |       |          |       | Association with time spent in education in UKBB split sample group A |       |         |       |        | Association with refractive error in UKBB split sample group A |         |       |        |       | Association with time spent in education in UKBB split sample group B |       |        |       |         | Association with refractive error in UKBB split sample group B |  |  |  |  |
|------------|-----------------|------|---------|------------------------------------------------------------------------|--------------------|-----------|--------|-------|----------|--------------------|--------------------------------------------------------------|----------|--------|-------|----------|-------------------------------------------------------|--------|-------|----------|-------|-----------------------------------------------------------------------|-------|---------|-------|--------|----------------------------------------------------------------|---------|-------|--------|-------|-----------------------------------------------------------------------|-------|--------|-------|---------|----------------------------------------------------------------|--|--|--|--|
| RSID       | SNPID           | Chro | Pos     | Okbay Effect allele                                                    | Okbay Other allele | Okbay EAF | Beta   | SE    | P        | UKBB Effect allele | UKBB Other allele                                            | UKBB EAF | Beta   | SE    | P        | N                                                     | Beta   | SE    | P        | N     | Beta                                                                  | SE    | P       | N     | Beta   | SE                                                             | P       | N     | Beta   | SE    | P                                                                     | N     |        |       |         |                                                                |  |  |  |  |
| rs301800   | rs301800        | 1    | 8490603 | T                                                                      | C                  | 0.1791    | 0.019  | 0.003 | 1.79E-08 | C                  | T                                                            | 0.824    | -0.070 | 0.017 | 5.86E-05 | 69798                                                 | -0.010 | 0.019 | 5.88E-01 | 69798 | -0.109                                                                | 0.024 | 7.2E-06 | 34982 | -0.009 | 0.026                                                          | 7.3E-01 | 34982 | -0.029 | 0.025 | 2.3E-01                                                               | 34816 | -0.011 | 0.027 | 6.9E-01 | 34816                                                          |  |  |  |  |
| rs11210860 | 1:43982527_G_A  | 1    | 7       | A                                                                      | G                  | 0.3694    | 0.017  | 0.003 | 2.36E-10 | A                  | G                                                            | 0.371    | 0.056  | 0.014 | 3.25E-05 | 69798                                                 | -0.031 | 0.015 | 3.66E-02 | 69798 | 0.043                                                                 | 0.019 | 2.4E-02 | 34982 | -0.039 | 0.020                                                          | 5.8E-02 | 34982 | 0.069  | 0.019 | 3.3E-04                                                               | 34816 | -0.022 | 0.021 | 3.0E-01 | 34816                                                          |  |  |  |  |
| rs34305371 | rs34305371      | 1    | 0       | A                                                                      | G                  | 0.08769   | 0.035  | 0.005 | 3.76E-14 | A                  | G                                                            | 0.098    | 0.064  | 0.022 | 3.16E-03 | 69798                                                 | -0.018 | 0.023 | 4.29E-01 | 69798 | 0.079                                                                 | 0.031 | 1.0E-02 | 34982 | -0.013 | 0.033                                                          | 6.9E-01 | 34982 | 0.049  | 0.031 | 1.1E-01                                                               | 34816 | -0.024 | 0.033 | 4.8E-01 | 34816                                                          |  |  |  |  |
| rs256895   | 1:72762169_T_C  | 1    | 9       | T                                                                      | C                  | 0.2369    | -0.017 | 0.003 | 1.80E-08 | C                  | T                                                            | 0.741    | 0.054  | 0.016 | 6.66E-04 | 69798                                                 | -0.068 | 0.017 | 7.23E-05 | 69798 | 0.026                                                                 | 0.022 | 2.5E-01 | 34982 | -0.074 | 0.024                                                          | 2.0E-03 | 34982 | 0.082  | 0.022 | 2.6E-04                                                               | 34816 | -0.060 | 0.024 | 1.3E-02 | 34816                                                          |  |  |  |  |
| rs1008078  | 1:91189731_C_T  | 1    | 1       | T                                                                      | C                  | 0.3731    | -0.016 | 0.003 | 6.01E-10 | T                  | C                                                            | 0.390    | -0.057 | 0.013 | 2.29E-05 | 69798                                                 | 0.048  | 0.014 | 8.16E-04 | 69798 | -0.064                                                                | 0.019 | 7.6E-04 | 34982 | 0.053  | 0.020                                                          | 9.0E-03 | 34982 | -0.050 | 0.019 | 8.4E-03                                                               | 34816 | 0.044  | 0.021 | 3.3E-02 | 34816                                                          |  |  |  |  |
| rs11588857 | 1:204587047_G_A | 1    | 47      | A                                                                      | G                  | 0.209     | 0.02   | 0.003 | 5.27E-10 | A                  | G                                                            | 0.208    | 0.053  | 0.016 | 1.05E-03 | 69798                                                 | -0.020 | 0.017 | 2.51E-01 | 69798 | 0.057                                                                 | 0.023 | 1.2E-02 | 34982 | -0.003 | 0.024                                                          | 9.0E-01 | 34982 | 0.048  | 0.023 | 3.5E-02                                                               | 34816 | -0.038 | 0.025 | 1.2E-01 | 34816                                                          |  |  |  |  |
| rs1777827  | 1:211613114_G_A | 1    | 14      | A                                                                      | G                  | 0.569     | 0.015  | 0.003 | 1.55E-08 | A                  | G                                                            | 0.594    | 0.013  | 0.013 | 3.17E-01 | 69798                                                 | -0.001 | 0.014 | 9.45E-01 | 69798 | 0.030                                                                 | 0.019 | 1.1E-01 | 34982 | 0.002  | 0.020                                                          | 9.2E-01 | 34982 | -0.003 | 0.019 | 8.6E-01                                                               | 34816 | -0.004 | 0.021 | 8.3E-01 | 34816                                                          |  |  |  |  |
| rs2992632  | 1:243503764_A_T | 1    | 64      | A                                                                      | T                  | 0.6604    | 0.017  | 0.003 | 8.23E-09 | T                  | A                                                            | 0.289    | -0.046 | 0.015 | 1.60E-03 | 69798                                                 | 0.011  | 0.016 | 4.93E-01 | 69798 | -0.044                                                                | 0.021 | 3.6E-02 | 34982 | -0.008 | 0.022                                                          | 7.2E-01 | 34982 | -0.049 | 0.021 | 1.7E-02                                                               | 34816 | 0.030  | 0.022 | 1.8E-01 | 34816                                                          |  |  |  |  |
| rs76076331 | 2:10977585_C_T  | 2    | 5       | T                                                                      | C                  | 0.09328   | 0.02   | 0.004 | 3.63E-08 | T                  | C                                                            | 0.121    | 0.053  | 0.020 | 8.67E-03 | 69798                                                 | 0.027  | 0.022 | 2.05E-01 | 69798 | 0.019                                                                 | 0.028 | 5.0E-01 | 34982 | 0.058  | 0.030                                                          | 5.2E-02 | 34982 | 0.086  | 0.028 | 2.6E-03                                                               | 34816 | -0.005 | 0.031 | 8.8E-01 | 34816                                                          |  |  |  |  |
| rs11689269 | 2:15621917_C_G  | 2    | 7       | C                                                                      | G                  | 0.306     | 0.016  | 0.003 | 1.28E-08 | G                  | C                                                            | 0.668    | -0.024 | 0.014 | 9.40E-02 | 69798                                                 | -0.012 | 0.015 | 4.38E-01 | 69798 | -0.037                                                                | 0.020 | 6.1E-02 | 34982 | -0.003 | 0.021                                                          | 8.9E-01 | 34982 | -0.010 | 0.020 | 6.3E-01                                                               | 34816 | -0.020 | 0.022 | 3.4E-01 | 34816                                                          |  |  |  |  |
| rs1606974  | 2:51873599_A_G  | 2    | 9       | A                                                                      | G                  | 0.1101    | 0.022  | 0.004 | 2.80E-08 | G                  | A                                                            | 0.880    | -0.046 | 0.020 | 2.08E-02 | 69798                                                 | 0.044  | 0.021 | 3.58E-02 | 69798 | -0.020                                                                | 0.028 | 4.8E-01 | 34982 | 0.065  | 0.030                                                          | 2.9E-02 | 34982 | -0.072 | 0.028 | 9.6E-03                                                               | 34816 | 0.023  | 0.030 | 4.5E-01 | 34816                                                          |  |  |  |  |
| rs11690172 | 2:57387094_A_G  | 2    | 4       | A                                                                      | G                  | 0.6119    | 0.015  | 0.003 | 1.99E-08 | G                  | A                                                            | 0.402    | -0.021 | 0.013 | 1.16E-01 | 69798                                                 | -0.011 | 0.014 | 4.66E-01 | 69798 | -0.039                                                                | 0.019 | 3.9E-02 | 34982 | -0.019 | 0.020                                                          | 3.4E-01 | 34982 | -0.003 | 0.019 | 8.6E-01                                                               | 34816 | -0.001 | 0.021 | 9.5E-01 | 34816                                                          |  |  |  |  |
| rs2457660  | 2:60757419_C_T  | 2    | 9       | T                                                                      | C                  | 0.6063    | -0.017 | 0.003 | 7.11E-10 | T                  | C                                                            | 0.633    | -0.040 | 0.014 | 3.81E-03 | 69798                                                 | 0.019  | 0.015 | 1.96E-01 | 69798 | -0.034                                                                | 0.019 | 8.3E-02 | 34982 | 0.017  | 0.021                                                          | 4.2E-01 | 34982 | -0.047 | 0.019 | 1.6E-02                                                               | 34816 | 0.022  | 0.021 | 3.0E-01 | 34816                                                          |  |  |  |  |
| rs10496091 | rs10496091      | 2    | 1       | A                                                                      | G                  | 0.2705    | -0.018 | 0.003 | 5.62E-10 | A                  | G                                                            | 0.277    | -0.039 | 0.015 | 8.31E-03 | 69798                                                 | -0.027 | 0.016 | 8.54E-02 | 69798 | -0.050                                                                | 0.021 | 1.6E-02 | 34982 | -0.047 | 0.022                                                          | 3.4E-02 | 34982 | -0.027 | 0.021 | 1.9E-01                                                               | 34816 | -0.007 | 0.023 | 7.5E-01 | 34816                                                          |  |  |  |  |
| rs13402908 | 2:100333377_T_C | 2    | 77      | T                                                                      | C                  | 0.5056    | -0.018 | 0.003 | 1.70E-11 | C                  | T                                                            | 0.525    | 0.036  | 0.013 | 6.28E-03 | 69798                                                 | 0.016  | 0.014 | 2.48E-01 | 69798 | 0.035                                                                 | 0.019 | 6.1E-02 | 34982 | 0.029  | 0.020                                                          | 1.5E-01 | 34982 | 0.037  | 0.019 | 5.1E-02                                                               | 34816 | 0.003  | 0.020 | 8.7E-01 | 34816                                                          |  |  |  |  |
| rs4851251  | 2:100753490_C_T | 2    | 90      | T                                                                      | C                  | 0.2537    | -0.017 | 0.003 | 1.91E-08 | T                  | C                                                            | 0.268    | -0.031 | 0.015 | 3.94E-02 | 69798                                                 | 0.008  | 0.016 | 6.33E-01 | 69798 | -0.011                                                                | 0.021 | 5.8E-01 | 34982 | 0.009  | 0.022                                                          | 6.8E-01 | 34982 | -0.050 | 0.021 | 1.8E-02                                                               | 34816 | 0.007  | 0.023 | 7.7E-01 | 34816                                                          |  |  |  |  |
| rs12987662 | 2:100821548_C_A | 2    | 48      | A                                                                      | C                  | 0.3787    | 0.027  | 0.003 | 2.69E-24 | A                  | C                                                            | 0.393    | 0.067  | 0.013 | 6.47E-07 | 69798                                                 | -0.012 | 0.014 | 4.02E-01 | 69798 | 0.065                                                                 | 0.019 | 6.8E-04 | 34982 | 0.004  | 0.020                                                          | 8.4E-01 | 34982 | 0.069  | 0.019 | 3.0E-04                                                               | 34816 | -0.030 | 0.021 | 1.5E-01 | 34816                                                          |  |  |  |  |
| rs17824247 | 2:144152539_T_C | 2    | 39      | T                                                                      | C                  | 0.5802    | -0.016 | 0.003 | 2.77E-09 | C                  | T                                                            | 0.403    | 0.025  | 0.013 | 6.09E-02 | 69798                                                 | -0.005 | 0.014 | 7.31E-01 | 69798 | 0.028                                                                 | 0.019 | 1.4E-01 | 34982 | 0.001  | 0.020                                                          | 9.7     |       |        |       |                                                                       |       |        |       |         |                                                                |  |  |  |  |

[illegible]
